# Supplementary material
Source: Springer Nature journal article supplement (https://www.springermedizin.de/resource/supplementary/12895_2014_170_MOESM3_ESM.pdf/9514260)
Supplement: MOESM3 [file 9514260]

### Stage 1. Seated heel-rises (both legs)

- Level 1      10 x 3 sets 3 times per day everyday
- Level 2      15 x 3 sets 3 times per day everyday
- Level 3      20 x 3 sets 3 times per day everyday
- Level 4      25 x 3 sets 3 times per day everyday

### Stage 2. Standing heel-rises (both legs)

- Level 1      10 x 3 sets 3 times per day everyday
- Level 2      15 x 3 sets 3 times per day everyday
- Level 3      20 x 3 sets 3 times per day everyday
- Level 4      25 x 3 sets 3 times per day everyday

### Stage 3. One legged heel-rises

- Level 1      10 x 3 sets 3 times per day everyday
- Level 2      15 x 3 sets 3 times per day everyday
- Level 3      20 x 3 sets 3 times per day everyday
- Level 4      25 x 3 sets 3 times per day everyday
